# Supplementary material
Source: PubMed Central journal article supplement (PMC5836158)

Supplemental Table 1: List of 15 common mitochondrial SNPs (minor allele frequency [MAF]  $\geq 10\%$ ) used in the study

| Mitochondrial SNP | Position | Gene    | Minor allele | Common allele | MAF   |
|-------------------|----------|---------|--------------|---------------|-------|
| rs28358576        | 1811     | MT-RNR2 | G            | A             | 13.9% |
| rs2854128         | 2706     | MT-RNR2 | A            | G             | 43.5% |
| rs3928306         | 3010     | MT-RNR2 | A            | G             | 23.8% |
| rs2015062         | 7028     | MT-CO1  | C            | T             | 43.3% |
| rs28358279        | 10463    | MT-TR   | G            | A             | 11.0% |
| rs3915952         | 11251    | MT-ND4  | C            | T             | 21.8% |
| rs2853493         | 11467    | MT-ND4  | G            | A             | 22.3% |
| rs2853495         | 11719    | MT-ND4  | C            | T             | 47.9% |
| rs2853498         | 12308    | MT-TL2  | G            | A             | 22.4% |
| rs28359172        | 12612    | MT-ND5  | C            | T             | 10.8% |
| rs3899498         | 13368    | MT-ND5  | T            | C             | 10.5% |
| rs28359178        | 13708    | MT-ND5  | A            | G             | 13.1% |
| rs28357682        | 14905    | MT-CytB | T            | C             | 10.5% |
| rs3088309         | 15452    | MT-CytB | T            | G             | 20.9% |
| rs527236210       | 15607    | MT-CytB | G            | A             | 10.4% |

Supplemental Table 2: Gene-set analysis of mtSNP interactions with mitochondria-related nuclear genes (as compared with non-mitochondrial-related genes) for risk of bipolar disorder (BD) and early-onset BD for each mitochondrial SNP. The gene-set analysis is based on association results for the 1df interaction tests.

| Mitochondria<br>1 SNP | Position | Risk of BD                                             |                                                        |                      | Early-onset BD                                         |                                                        |                      |
|-----------------------|----------|--------------------------------------------------------|--------------------------------------------------------|----------------------|--------------------------------------------------------|--------------------------------------------------------|----------------------|
|                       |          | Observed<br>number of<br>genes<br>above the<br>cutoff* | Expected<br>number of<br>genes<br>above the<br>cutoff* | Gene-set<br>p-value* | Observed<br>number<br>of genes<br>above the<br>cutoff* | Expected<br>number of<br>genes<br>above the<br>cutoff* | Gene-set<br>p-value* |
| rs28358576            | 1811     | 203                                                    | 219                                                    | 0.87                 | 216                                                    | 218                                                    | 0.46                 |
| rs2854128             | 2706     | 210                                                    | 221                                                    | 0.73                 | 212                                                    | 219                                                    | 0.62                 |
| rs3928306             | 3010     | 211                                                    | 220                                                    | 0.74                 | 213                                                    | 219                                                    | 0.59                 |
| rs2015062             | 7028     | 222                                                    | 220                                                    | 0.33                 | 213                                                    | 220                                                    | 0.65                 |
| rs28358279            | 10463    | 209                                                    | 218                                                    | 0.69                 | 230                                                    | 221                                                    | 0.13                 |
| rs3915952             | 11251    | 214                                                    | 221                                                    | 0.64                 | 218                                                    | 219                                                    | 0.47                 |
| rs2853493             | 11467    | 209                                                    | 218                                                    | 0.70                 | 197                                                    | 217                                                    | 0.94                 |
| rs2853495             | 11719    | 208                                                    | 222                                                    | 0.82                 | 202                                                    | 219                                                    | 0.89                 |
| rs2853498             | 12308    | 204                                                    | 218                                                    | 0.81                 | 195                                                    | 219                                                    | 0.97                 |
| rs28359172            | 12612    | 209                                                    | 220                                                    | 0.75                 | 203                                                    | 219                                                    | 0.86                 |
| rs3899498             | 13368    | 222                                                    | 219                                                    | 0.32                 | 235                                                    | 219                                                    | <b>0.05</b>          |
| rs28359178            | 13708    | 240                                                    | 217                                                    | <b>0.02</b>          | 202                                                    | 221                                                    | 0.92                 |
| rs28357682            | 14905    | 231                                                    | 219                                                    | 0.11                 | 236                                                    | 220                                                    | <b>0.05</b>          |
| rs3088309             | 15452    | 217                                                    | 221                                                    | 0.54                 | 220                                                    | 219                                                    | 0.38                 |
| rs527236210           | 15607    | 228                                                    | 219                                                    | 0.17                 | 232                                                    | 220                                                    | 0.10                 |

\* Enrichment was tested with a cutoff that equals the 75<sup>th</sup> percentile of all gene p-values

Supplemental Figure 1. Manhattan plots for the top hits for risk of BD with mtSNP rs3088309.

(A) 2-degree-of-freedom test

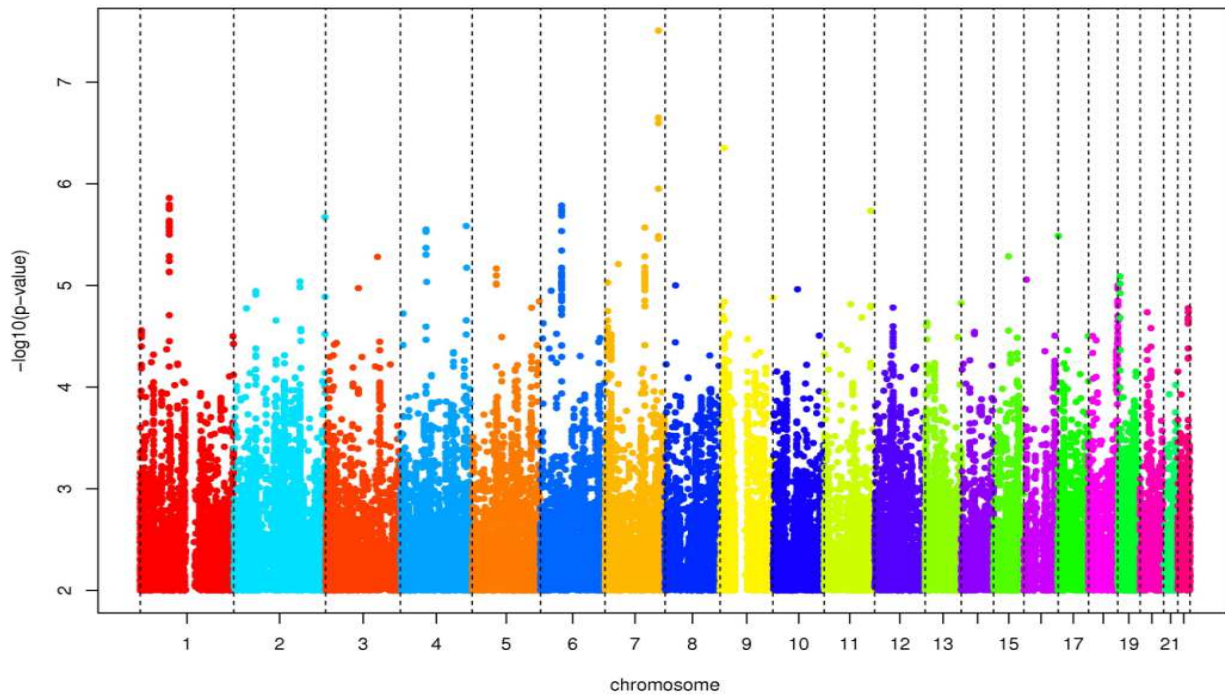

(B) Interaction test

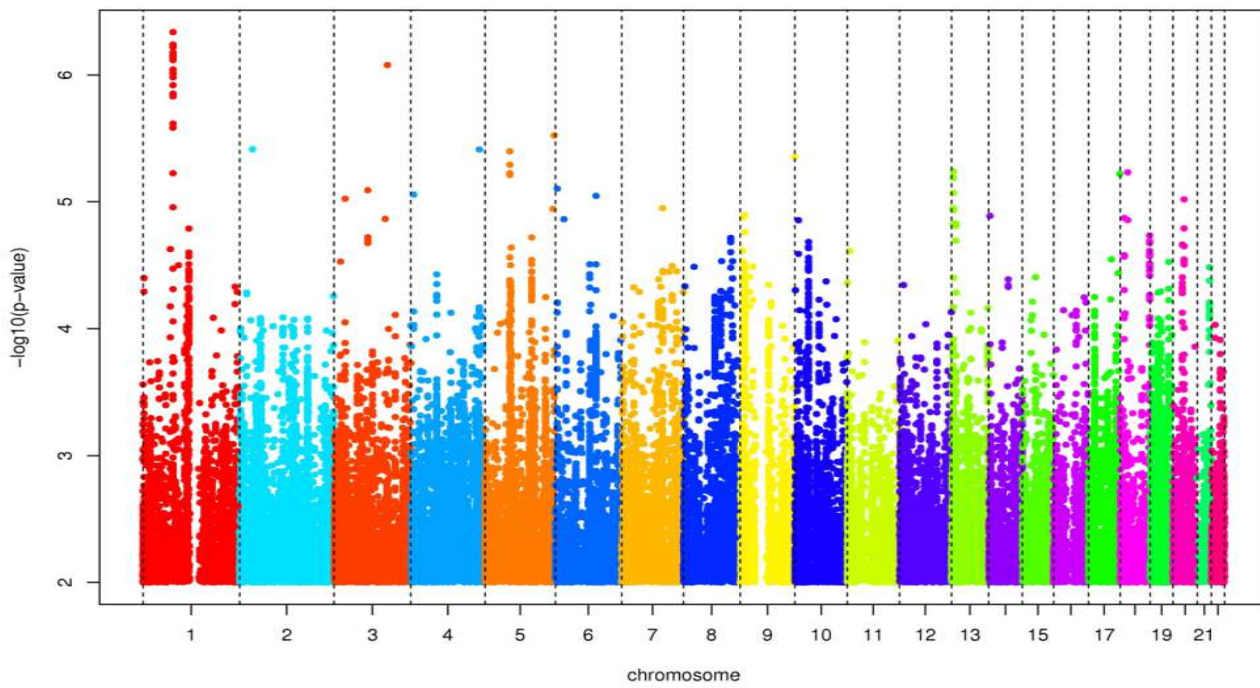

Supplemental Figure 2. Manhattan plots for the top hits for risk of BD with mtSNP rs3088309.

(A) 2-degree-of-freedom test

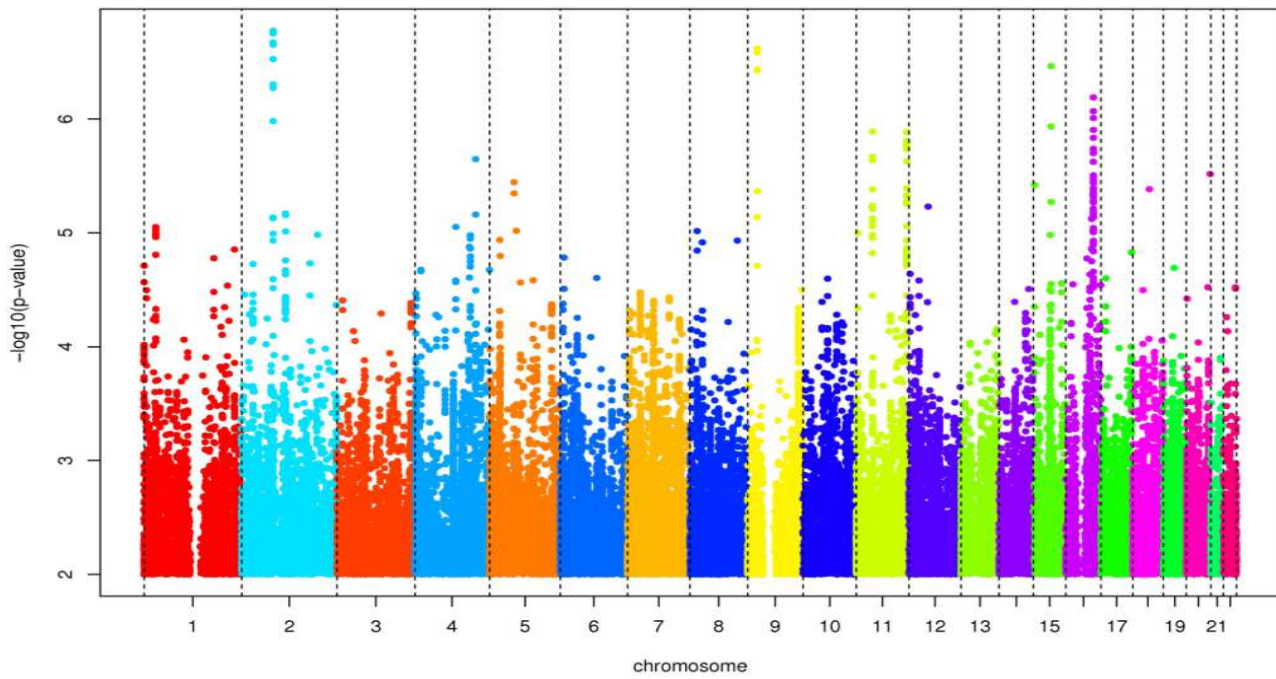

(B) Interaction test

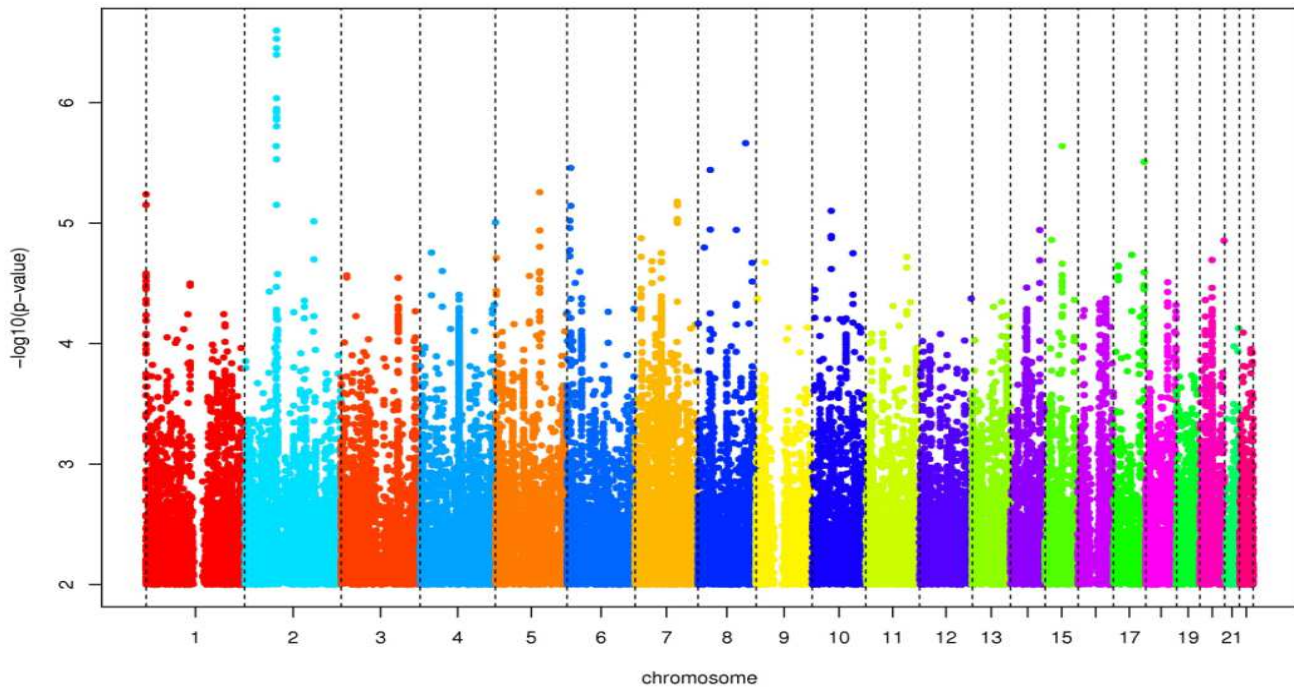

Supplement: mnp-0003-0125-s01.pdf [file mnp-0003-0125-s01.pdf]
